# Supplementary material for: Tackling suppressive cancer microenvironment by NARF-derived immune modulatory vaccine and its validation using simulation strategies
Source: Frontiers journal article supplement (doi:10.3389/fphy.2024.1342115), 2024-02-22
Supplement: Data_Sheet_1.docx [file Data_Sheet_1.docx]

**Legends to Table**

**Supplementary Table S1** Predicted discontinuous B-cell epitopes in the final vaccine construct.

**Supplementary Table S2** Intermolecular interaction details between TLRs and vaccine of the docked complexes.

**Legends to figure**

| **Supplementary Figure S1 Class combined** population **coverage of predicted T-cell epitopes (A)** World and **(B)** Indian population.  **Supplementary Figure S2** Structure prediction and modelling of the vaccine construct **(A)** 2D structure prediction and **(B)** 3D structure of the modelled vaccine.  **Supplementary Figure S3** Interacting residues of different TLR receptors with vaccine **(A)** TLR-2 with vaccine **(B)** TLR-4 with vaccine **(C)** TLR-7 with vaccine **(D)** TLR-9 with vaccine.  **Supplementary Figure S4.** Normal mode analysis of docked complex. **(A)** NMA mobility of the vaccine-TLR-2 complex with affine-model arrows, **(B)** Deformability plot, **(C)** B-factor plot, **(D)** Eigenvalue plot, **(E)** Normal mode variance plot, **(F)** Covariance map and **(G)** Elastic network.  **Supplementary Figure S5.** Normal mode analysis of docked complex. **(A)** NMA mobility of the vaccine-TLR-9 complex with affine-model arrows, **(B)** Deformability plot, **(C)** B-factor plot, **(D)** Eigenvalue plot, **(E)** Normal mode variance plot, **(F)** Covariance map and **(G)** Elastic network. |
| --- |

**Supplementary Table S1** Predicted discontinuous B-cell epitopes in the final vaccine construct.

| **S. No.** | **Discontinuous B-cell epitopes** | **Number of residues** | **Score** |
| --- | --- | --- | --- |
| 1 | DPLPPPLAPDFLSPPAE | 18 | 0.963 |
| 2 | GEAPPVPVAYSVNWDAIAQCESGGNWSINTGNGYYGGLRFTAGTWRANGGSGSAANASREEQIRVAENVLRSQGIRAWPVCGRR | 84 | 0.753 |
| 3 | MLRLVVGALLLVLAFAGGYAVAACKTVTLTVDGTAMRVTTMKSRVIDIVEENGFSVDDRDDLYPAAGVQVHDADTIVLRRSRPLQISLDGHDAKQVWTTASTVDEALAQLAMTDTAPASRASRVPLSGMALVSAKTVVHPVEGM | 144 | 0.741 |
| 4 | GEAAKSSAHVQELYAAYSPEKIFHVIAAYSSAGSADAPMKNARTTLIAAAGTVTTSPAGIANADDAGLDPAVGFDPNLPPAPDAAPVDTPPAPEDAGF | 99 | 0.683 |

**Supplementary Table S2** Intermolecular interaction details between TLRs and vaccine of the docked complexes.

| **Complex** | **No. of salt bridges** | **No. of Hydrogen bonds** | **No. of Non-bonded contacts** |
| --- | --- | --- | --- |
| TLR-2- vaccine | - | - | 140 |
| TLR-4- vaccine | 8 | 24 | 311 |
| TLR-7- vaccine | 8 | 16 | 225 |
| TLR-9- vaccine | 4 | 24 | 258 |

| **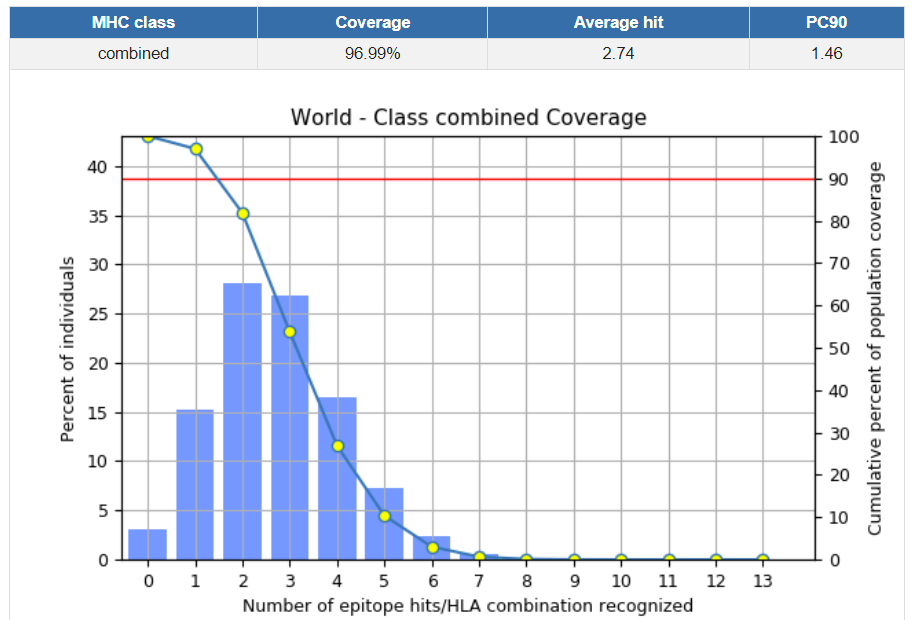** |
| --- |
| **(A)** |
| **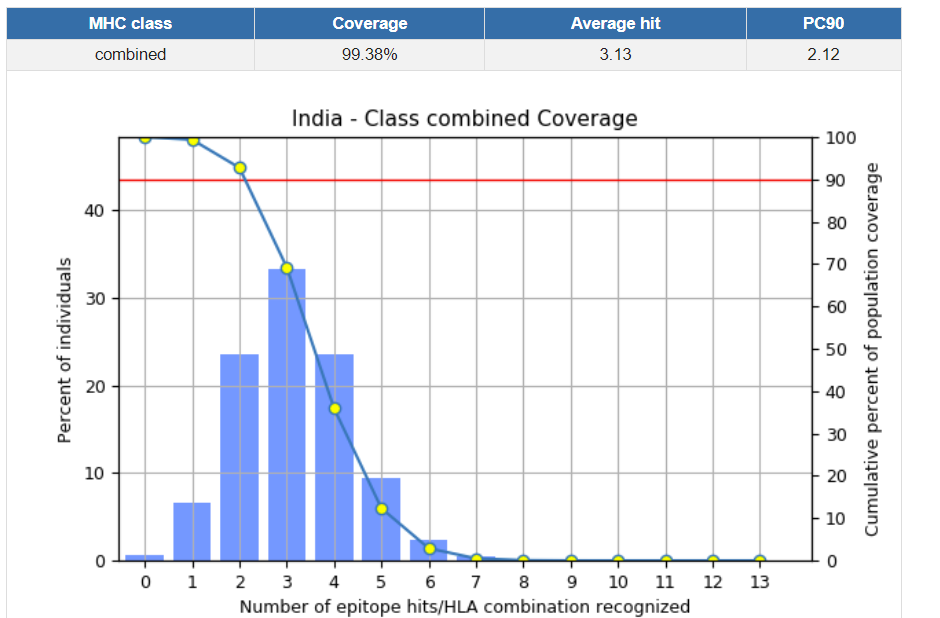** |
| **(B)** |
| **Supplementary Figure S1. Class combined** population **coverage of predicted T-cell epitopes (A)** World and **(B)** Indian population. |

| 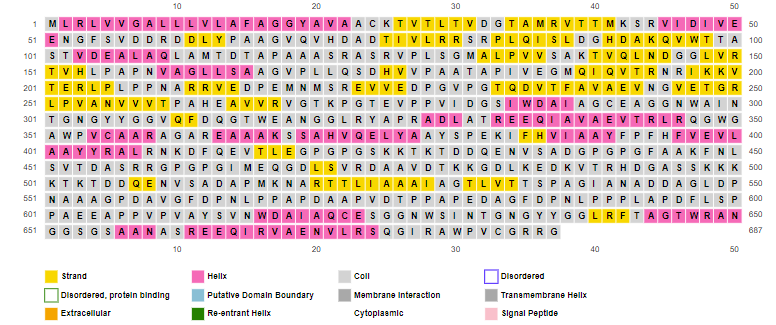 |
| --- |
| **(A)** |
| 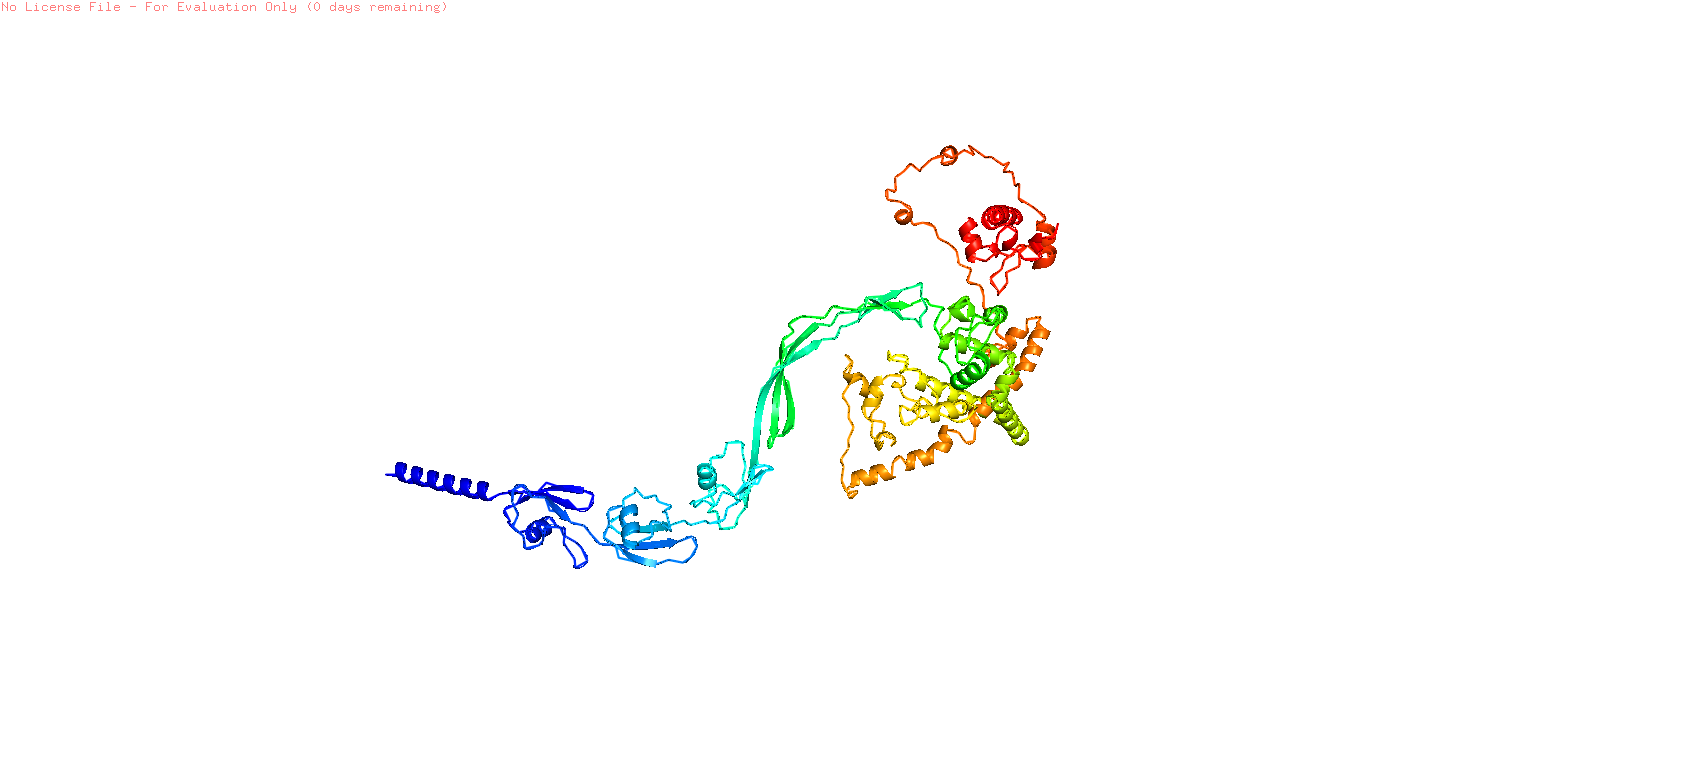 |
| **(B)** |
| **Supplementary Figure S2.** Structure prediction and modelling of the vaccine construct **(A)** 2D structure prediction and **(B)** 3D structure of the modelled vaccine. |

| 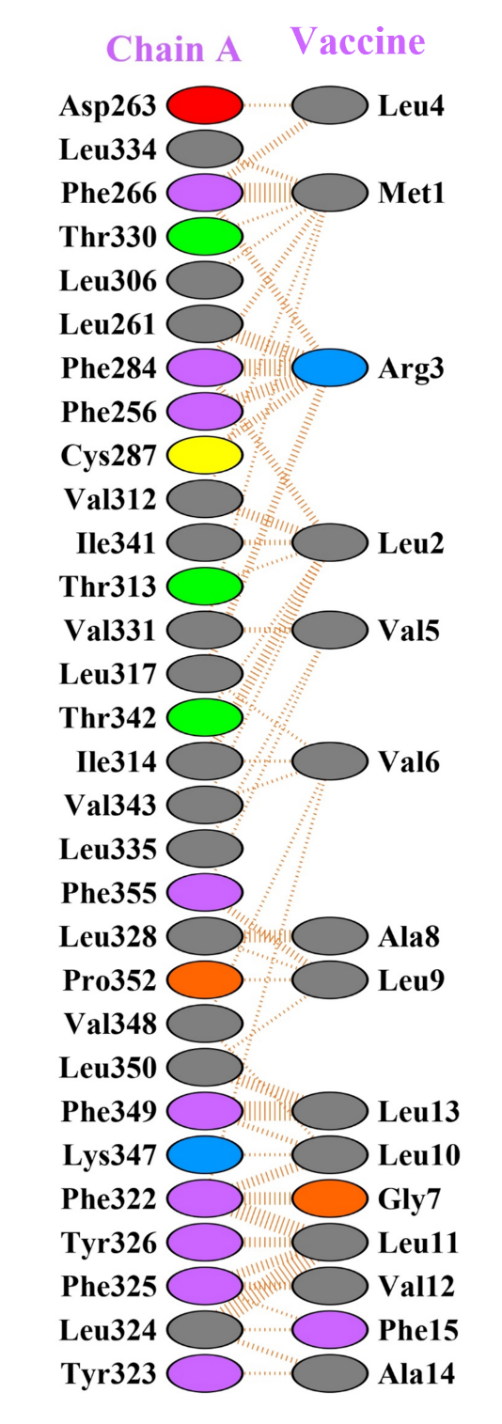 | |
| --- | --- |
| **(A)** | |
| 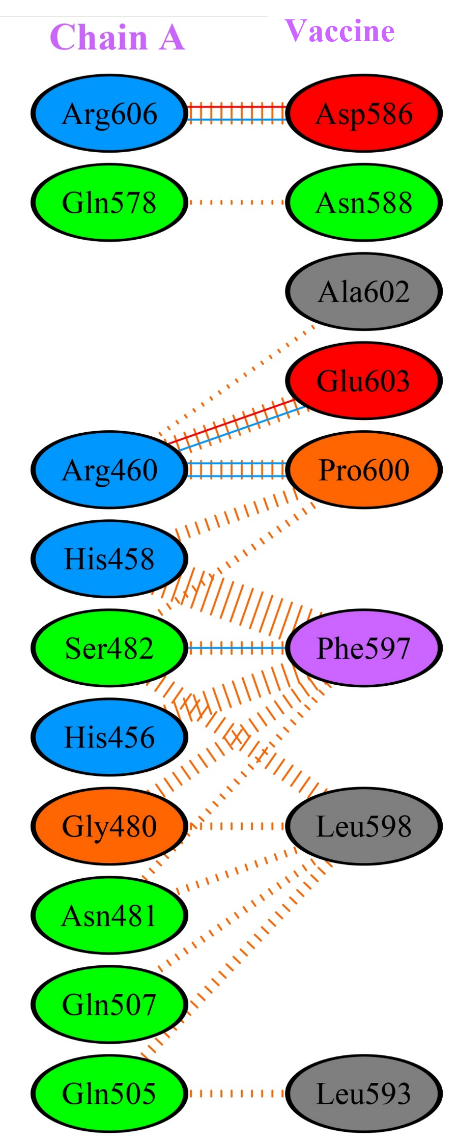 | 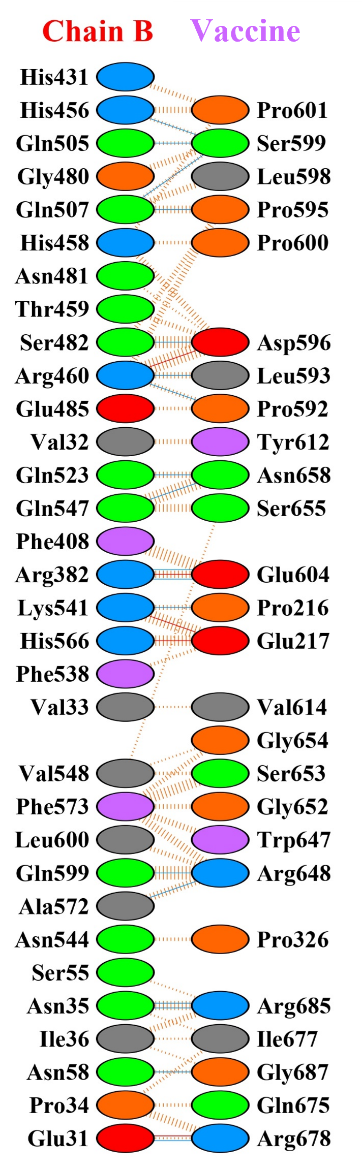 |
| 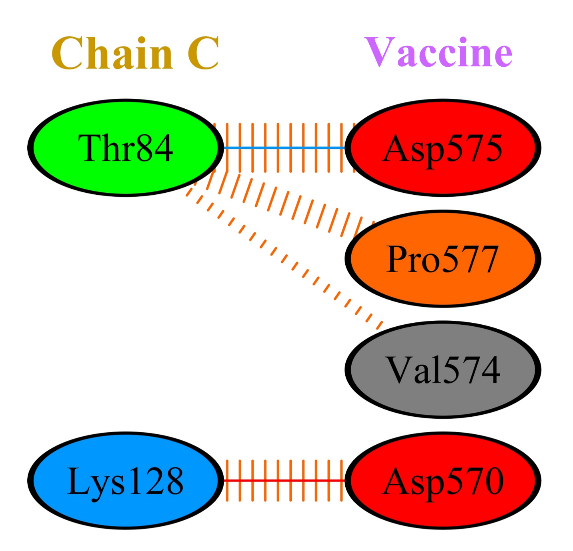 | 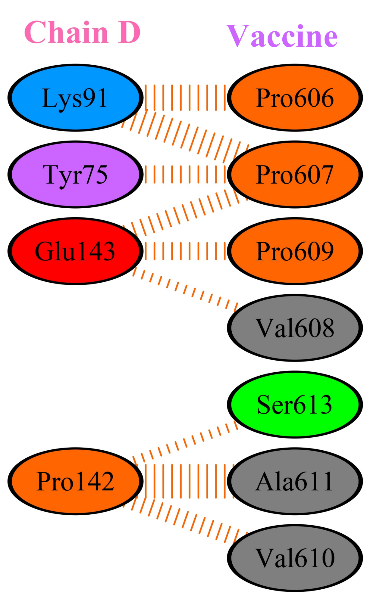 |
| **(B)** | |
| 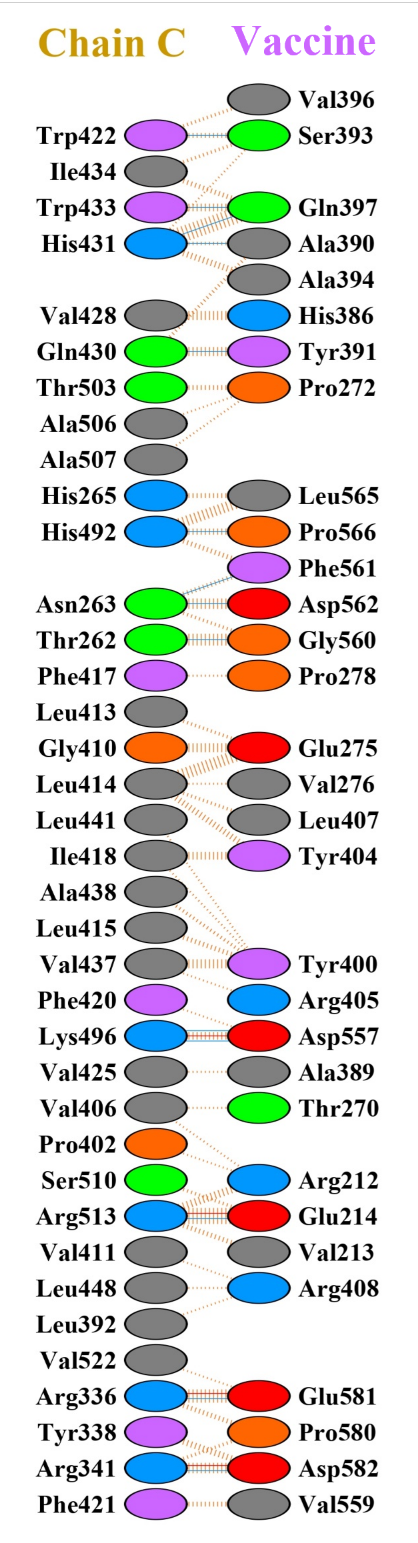 | 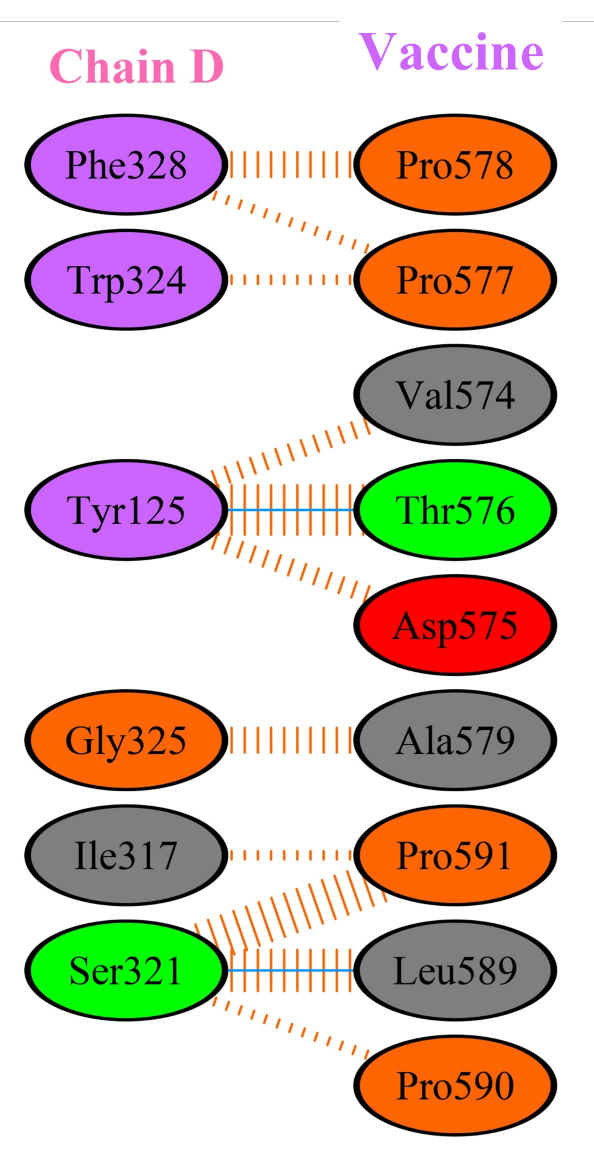 |
| **(C)** | |
| 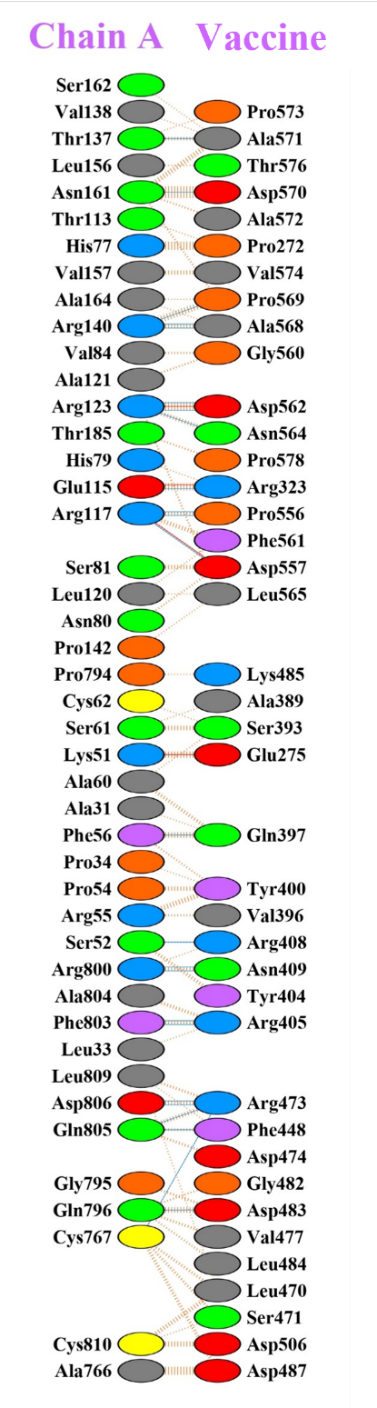 | |
| **(D)** | |
| 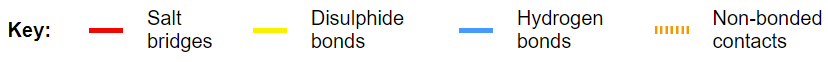 | |
| **Supplementary Figure S3.** Interacting residues of different TLR receptors with vaccine **(A)** TLR-2 with vaccine **(B)** TLR-4 with vaccine **(C)** TLR-7 with vaccine **(D)** TLR-9 with vaccine. | |

| **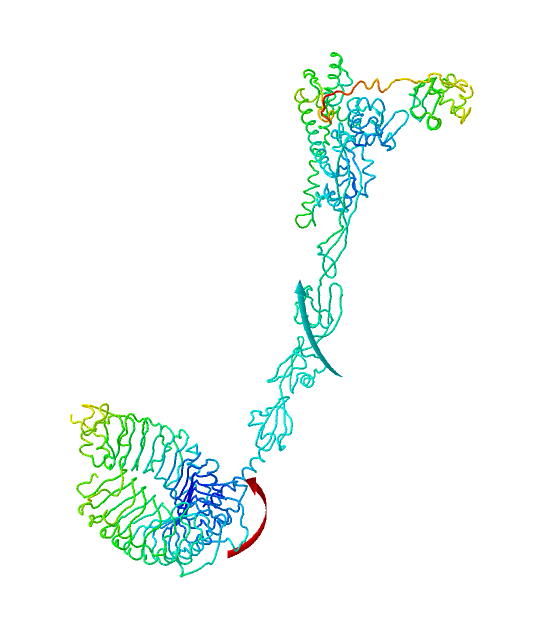** | | | | | |
| --- | --- | --- | --- | --- | --- |
| **(A)** | | | | | |
| 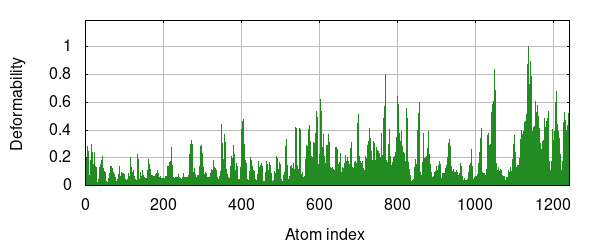 | | | 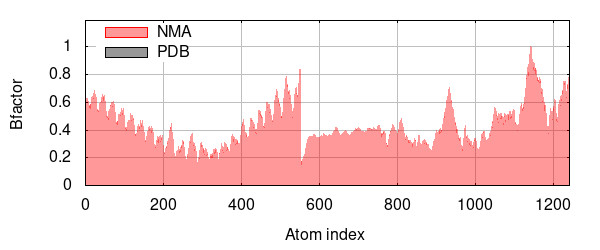 | | |
| **(B)** | | | **(C)** | | |
| 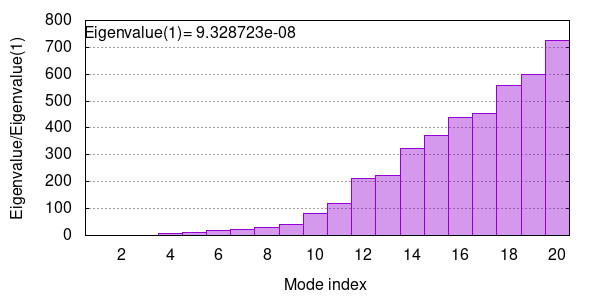 | | | 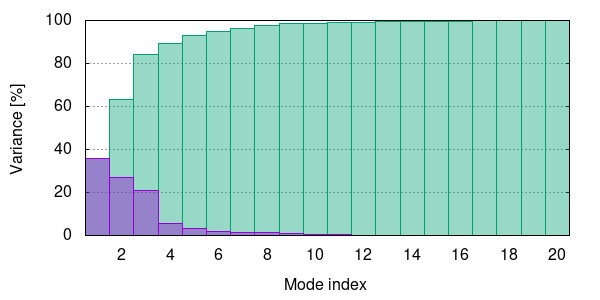 | | |
| **(D)** | | | **(E)** | | |
| 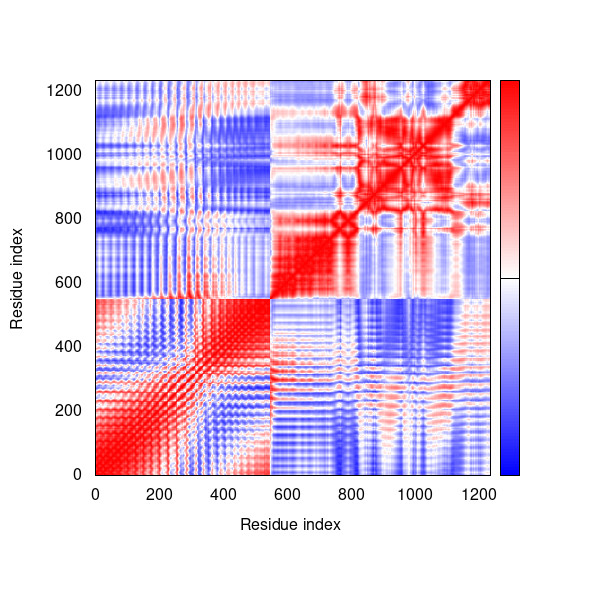 | | | 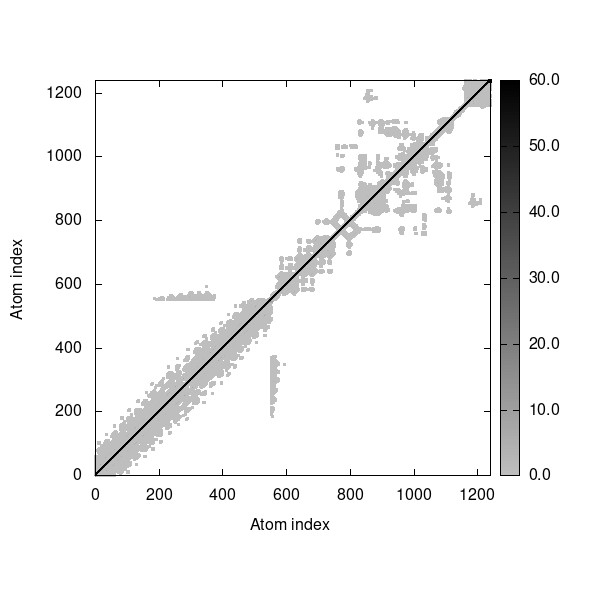 | | |
| **(F)** | | | **(G)** | | |
| **Supplementary Figure S4.** Normal mode analysis of docked complex. **(A)** NMA mobility of the vaccine-TLR-2 complex with affine-model arrows, **(B)** Deformability plot, **(C)** B-factor plot, **(D)** Eigenvalue plot, **(E)** Normal mode variance plot, **(F)** Covariance map and **(G)** Elastic network. | | | | | |
| **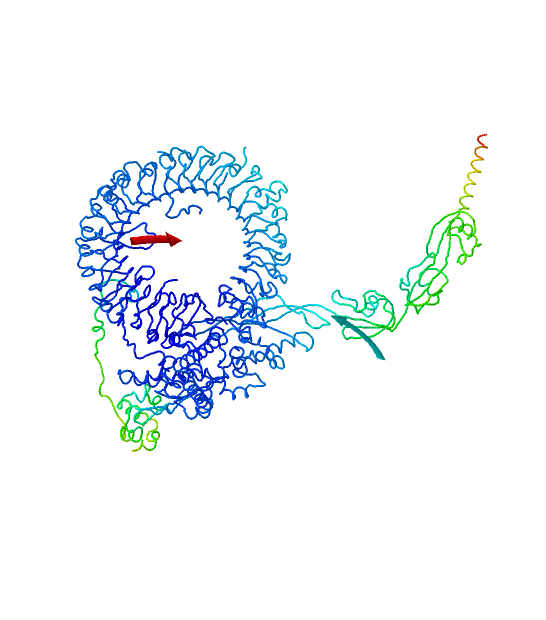** | | | | | |
| **(A)** | | | | | |
| **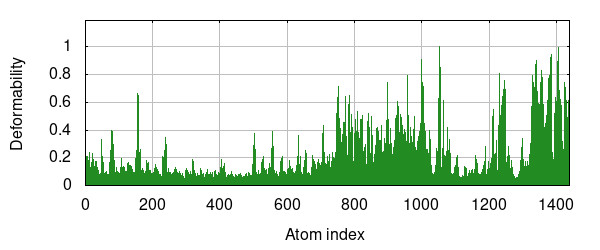** | | | **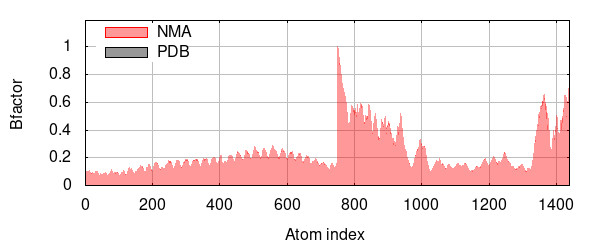** | | |
| **(B)** | | | **(C)** | | |
| **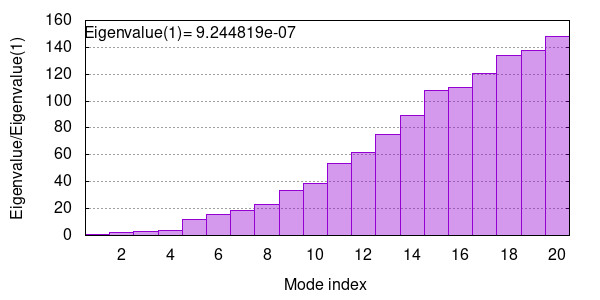** | | | **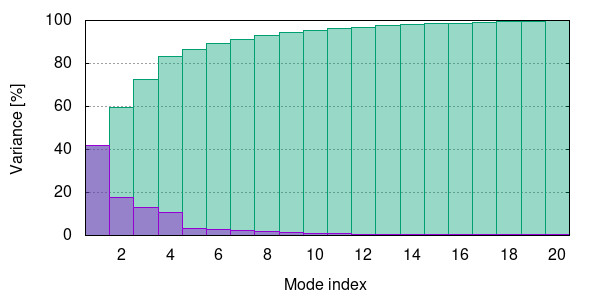** | | |
| **(D)** | | | **(E)** | | |
| **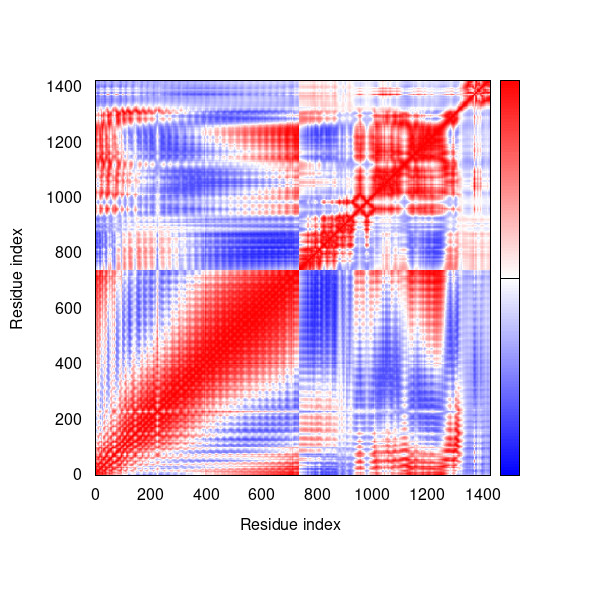** | | | **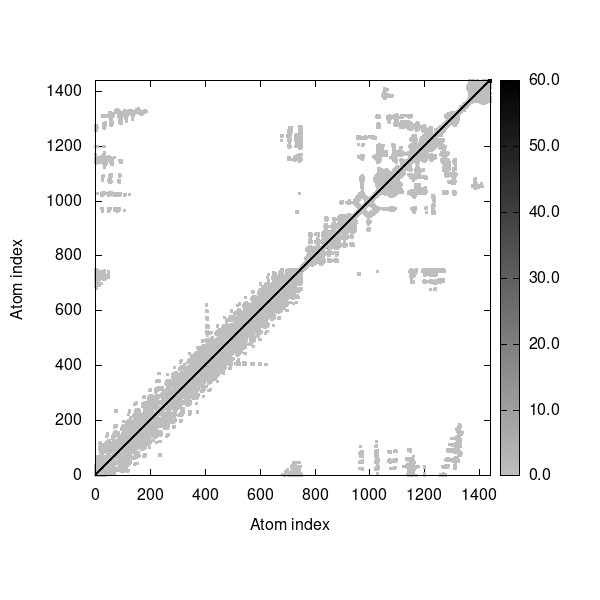** | | |
| **(F)** | | | **(G)** | | |
| **Supplementary Figure S5.** Normal mode analysis of docked complex. **(A)** NMA mobility of the vaccine-TLR-9 complex with affine-model arrows, **(B)** Deformability plot, **(C)** B-factor plot, **(D)** Eigenvalue plot, **(E)** Normal mode variance plot, **(F)** Covariance map and **(G)** Elastic network. | | | | | |
|  | | |
